# Supplementary material for: Effect of ancestry and shared genetic architecture of serious mental illness on symptoms and cognition in an admixed Latin American population
Source: medRxiv preprint, doi:10.64898/2026.05.05.26351986, version 2 (2026-05-07)
Supplement: SupplementaryTables [file 351986_file06.xlsx]

## Sheet: S Table 1
Supplementary Table 1. Clinical and demographic characteristics of the genotyped study sample.
		MDD (N=2,662)			SCZ (N=1,126)			BD1 (N=2,298)			BD (N=3,158)			Other (N=347)			Control (N=1,373)
		N	Mean	SD	N	Mean	SD	N	Mean	SD	N	Mean	SD	N	Mean	SD	N	Mean	SD
	Age	2662	49	15	1126	42	14.5302	2298	49	14.9394	3158	47	16.3848	347	42	16	1373	42.2646	15.3898
Variable	Counted Category	N	N: Counted Category	Percent: Counted Category	N	N: Counted Category	Percent: Counted Category	N	N: Counted Category	Percent: Counted Category	N	N: Counted Category	Percent: Counted Category	N	N: Counted Category	Percent: Counted Category	N	N: Counted Category	Percent: Counted Category
Sex	F	2662	1851	0.695342	1187	260	0.21904	2411	1402	0.581501	3158	2046	0.647878	347	137	0.394813	1373	882	0.642389
HSGrad	yes	2658	1786	0.671934	1118	481	0.430233	2287	969	0.423699	3145	1572	0.499841	344	163	0.473837	1369	937	0.684441
The sample size for a given variable may be less than the total sample size because of missing data. Diagnoses are significantly different in age, sex, and education distributions (p<2.2e-16 for each comparison)
The BD1 participants are a subset of the larger BD group, which also includes BD2 (n=550), other specified bipolar and related disorder (n=256) and unspecified bipolar disorder (n=54)
Diagnosis "other" includes SCZA (n=303), schizophreniform disorder (n=22), brief psychotic disorder (n=14), unspecified psychotic disorder (n=6), and delusional disorder (n=2)

## Sheet: S Table 2
Supplementary Table 2. The number of participants with cognitive performance assessments
Domain	Item	N. measures	Controls
Complex cognition	Matrix Analysis Accuracy	4912	1128
	Matrix Analysis Speed	4837	1115
Episodic memory	Digit Symbol Recall Accuracy	4975	1136
	Digit Symbol Recall Speed	4976	1136
	Face Memory Accuracy	5464	1177
	Face Memory Speed	5464	1177
Executive function	Continuous Performance Accuracy	4950	1147
	Continuous Performance Speed	4945	1146
	Digit Symbol Substitution Accuracy	4976	1136
	Digit Symbol Substitution Speed	4975	1136
	Letter -N- Back Accuracy	4919	1126
	Letter -N- Back Speed	4916	1125
Motor praxis	Motor Praxis Speed	5592	1185
Social cognition	Emotional Differentiation Accuracy	5581	1182
	Emotional Differentiation Speed	5591	1182
	Emotional Identification Accuracy	5403	1173
	Emotional Identification Speed	5403	1173

## Sheet: S Table 3
Supplementary Table 3. Public SMI GWAS used in this study
Disease	Cases	Controls	Sample composition	Author	Year	N. Loci	Dx definition
Bipolar disorder (BD)	27196	43792	EUR	O’Conell et al.1	2025	88	Clinically ascertained
Schizophrenia (SCZ)	74776	101023	53,386 EUR cases and 77,258 EUR controls (80%). 14,004 cases and 16757 controls ASN, 6,152 cases 3918 controls African American, and 1,234 cases, 3,090 controls Latrino	Trubetskoy et al2	2022	313	Consensus between psychiatrists according to DSM or ICD criteria, diagnostic interviews, review of medical records or hospital registers
Major depression disorder (MDD)	371,184	978703	EUR	Als et al.3	2023	243	Individuals with a ICD10 F32-F33 diagnosis in 2016 or earlier were considered as depression cases. Included co-ocurrence with BD, SCZ, autism, ADHD, SUD
BD type I (BD1)	14879	31358	EUR	Mullins et al.4	2021	44	Cases were required to meet international consensus criteria (DSM-IV, ICD-9 or ICD-10) for a lifetime diagnosis of BD, established using structured diagnostic instruments from assessments by trained interviewers, clinician-administered checklists or medical record review
1. O’Connell, K. S. et al. Genomics yields biological and phenotypic insights into bipolar disorder. Nature 2025 639:8056 639, 968–975 (2025).
2. Trubetskoy, V. et al. Mapping genomic loci implicates genes and synaptic biology in schizophrenia. Nature 2022 604:7906 604, 502–508 (2022).
3. Als, T. D. et al. Depression pathophysiology, risk prediction of recurrence and comorbid psychiatric disorders using genome-wide analyses. Nat Med 29, 1832–1844 (2023).
4. Mullins, N. et al. Genome-wide association study of more than 40,000 bipolar disorder cases provides new insights into the underlying biology. Nature Genetics 2021 53:6 53, 817–829 (2021)
.

## Sheet: S Table 4
Supplementary Table 4. GWAS SNP summary.
Phenotype	N_inGWAS	N_lifted	N_intersected	N_Analysed_PRS	N_Ancestry
MDD	7547116	7546297	6483107	904449	638795
BD	7613352	7612444	6503072	904883	639064
BD1	7391563	7390662	6316352	893451	631712
SCZ	7585077	7584161	6474888	904654	639135
Height	1377306	1377229	1131680	867884	NA
RCT	18473918	NA	906397	906397	NA
N_inGWAS: Number of SNPs in the original GWAS.
N_lifted: Number SNPs successfully lifted to GRCh38.
N_intersected: Number of SNPs found in BGE data
N_Analysed_PRS: Number of SNPs analysed in PRS (intersected BGE with the LD references)
N_Ancestry: Number of SNPs with infromation of local ancestry, used for partial PRS analysis

## Sheet: S Table 5
Supplementary Table 5. Prediction of diagnosis in Paisa with polygenic scores of diagnoses GWAS. Columns with "Joint Estimation" included the PCs in the model with the PRS, rather than regressing out the PCs from the PRS, prior to analysis and using the PRS residuals in analysis of diagnosis
PRS	diagnosis	Ncontrols	Ncases	OR	CI95_low	CI95_upp	p-val	mean_contols	mean_cases	OR Joint Estimation	CI95_low Joint Estimation	CI95_upp Joint Estimation	p-val Joint Estimation
MDD	BD1	1373	2298	1.14496	1.06416	1.2319	0.000288479	1.42335e-17	0.12634	1.14904	1.06898	1.23509	0.000163008
MDD	BD	1373	3158	1.18438	1.10568	1.26868	1.40862e-06	1.42335e-17	0.15989	1.17402	1.09564	1.25801	5.34322e-06
MDD	SCZ	1373	1126	1.15881	1.06292	1.26336	0.000824298	1.42335e-17	0.135942	1.16883	1.0732	1.27298	0.000340843
MDD	MDD	1373	2662	1.282	1.19162	1.37923	2.7341e-11	1.42335e-17	0.232962	1.28693	1.19781	1.38269	5.61157e-12
SCZ	BD1	1373	2298	1.65902	1.53701	1.79071	1.40745e-38	-2.16825e-18	0.481308	1.70812	1.5809	1.84557	7.05494e-42
SCZ	BD	1373	3158	1.52395	1.42137	1.63393	2.15839e-32	-2.16825e-18	0.41162	1.6099	1.49705	1.73126	9.5365e-38
SCZ	SCZ	1373	1126	2.09086	1.89871	2.30244	7.71832e-51	-2.16825e-18	0.678924	2.18388	1.97938	2.4095	1.13735e-54
SCZ	MDD	1373	2662	1.17376	1.09372	1.25967	8.74647e-06	-2.16825e-18	0.159981	1.16597	1.08605	1.25178	2.2497e-05
BD1	BD1	1373	2298	1.70111	1.57853	1.83322	4.58496e-44	-9.28099e-18	0.536603	1.75473	1.62519	1.89458	7.78144e-47
BD1	BD	1373	3158	1.54915	1.44709	1.6584	2.43346e-36	-9.28099e-18	0.453587	1.64954	1.53539	1.77218	1.35974e-42
BD1	SCZ	1373	1126	1.26897	1.16536	1.38178	4.21239e-08	-9.28099e-18	0.238369	1.29165	1.18359	1.40957	9.3929e-09
BD1	MDD	1373	2662	1.14087	1.06415	1.22312	0.000206719	-9.28099e-18	0.127974	1.14591	1.06776	1.22978	0.00015738
BD	BD1	1373	2298	1.64662	1.52793	1.77454	5.1502e-39	-4.29196e-17	0.498039	1.67799	1.55657	1.80888	1.43243e-41
BD	BD	1373	3158	1.52247	1.42185	1.63022	1.9658e-33	-4.29196e-17	0.431183	1.59642	1.48798	1.71276	7.88111e-39
BD	SCZ	1373	1126	1.30063	1.19375	1.41707	1.87659e-09	-4.29196e-17	0.259765	1.32388	1.21455	1.44306	1.77328e-10
BD	MDD	1373	2662	1.16367	1.08444	1.2487	2.52082e-05	-4.29196e-17	0.145594	1.16477	1.08592	1.24935	2.00255e-05
Height	BD1	1373	2298	0.958219	0.894144	1.02688	0.226786	-1.00543e-17	-0.0457183	0.954268	0.89033	1.0228	0.185856
Height	BD	1373	3158	0.965733	0.905218	1.03029	0.29092	-1.00543e-17	-0.0386326	0.953275	0.8925	1.01819	0.154529
Height	SCZ	1373	1126	0.982865	0.905735	1.06656	0.678494	-1.00543e-17	-0.0115102	0.979539	0.902324	1.06336	0.621659
Height	MDD	1373	2662	1.00052	0.935905	1.06959	0.987881	-1.00543e-17	-0.00453602	1.00171	0.93729	1.07056	0.95978
RCT	BD1	1373	2298	1.06654	0.995	1.14322	0.0689875	2.96617e-17	0.0660565	1.07005	0.999421	1.14567	0.0519701
RCT	BD	1373	3158	1.04877	0.982603	1.11938	0.152107	2.96617e-17	0.0474898	1.05921	0.992425	1.1305	0.0834205
RCT	SCZ	1373	1126	1.07825	0.992834	1.17102	0.0735813	2.96617e-17	0.0738113	1.07474	0.990832	1.16576	0.0822216
RCT	MDD	1373	2662	0.980485	0.915444	1.05015	0.573585	2.96617e-17	-0.0232946	0.97412	0.910871	1.04176	0.443958

## Sheet: S Table 6
Supplementary Table 6. Correlation of PRS in Paisa participants
	SCZ	MDD	BD	BD1
SCZ	1	0.19	0.42	0.41
MDD		1	0.18	0.11
BD			1	0.88
BD1				1

## Sheet: S Table 7
Supplementary Table 2. Prediction of SMI diagnoses in Paisa using partial PRS of specific ancestry, estimated from GWAS summary statistics.
PRS	Paisa diagnosis	Ncontrols	Ncases	OR	CI95_low	CI95_upp	p-val	mean_contols	mean_cases
pPRS_AFR_MDD	MDD	1373	2662	1.08457	1.01111	1.16337	0.0232793	-1.47875e-17	0.0702763
pPRS_AMR_MDD	MDD	1373	2662	1.11723	1.04739	1.19173	0.000763184	1.27257e-17	0.113562
pPRS_EUR_MDD	MDD	1373	2662	1.21037	1.13285	1.29319	1.56763e-08	2.23906e-17	0.187818
PRS_TOTAL_MDD	MDD	1373	2662	1.28071	1.19731	1.36993	5.96972e-13	3.84485e-19	0.237265
PRScs_MDD	MDD	1373	2662	1.28503	1.19998	1.37611	7.07228e-13	9.80757e-20	0.232962
pPRS_AFR_SCZ	SCZ	1373	1126	1.11984	1.03946	1.20644	0.00289729	-1.4735e-19	0.128065
pPRS_AMR_SCZ	SCZ	1373	1126	1.43655	1.32448	1.5581	2.30363e-18	-2.82098e-18	0.366734
pPRS_EUR_SCZ	SCZ	1373	1126	1.61863	1.48517	1.76409	5.41358e-28	7.49556e-18	0.451554
PRS_TOTAL_SCZ	SCZ	1373	1126	1.92656	1.76115	2.10752	1.72121e-46	-8.02483e-18	0.61284
PRScs_SCZ	SCZ	1373	1126	2.0726	1.89133	2.27125	6.50536e-55	-1.66808e-18	0.678924
pPRS_AFR_BD1	BD1	1373	2298	1.02649	0.958172	1.09968	0.456838	1.11569e-17	0.0246616
pPRS_AMR_BD1	BD1	1373	2298	1.30207	1.21551	1.39479	5.44664e-14	4.54053e-18	0.25783
pPRS_EUR_BD1	BD1	1373	2298	1.48548	1.38768	1.59017	4.74219e-30	2.14218e-17	0.410393
PRS_TOTAL_BD1	BD1	1373	2298	1.62903	1.51834	1.7478	4.50798e-42	2.79026e-18	0.490147
PRScs_BD1	BD1	1373	2298	1.69221	1.57719	1.81562	1.40905e-48	9.33566e-18	0.536603
pPRS_AFR_BD	BD	1373	2848	1.01307	0.946923	1.08384	0.706225	1.17686e-17	0.011815
pPRS_AMR_BD	BD	1373	2848	1.3128	1.22788	1.40359	1.49868e-15	5.47978e-18	0.260906
pPRS_EUR_BD	BD	1373	2848	1.36379	1.27987	1.45321	1.01594e-21	-9.63207e-19	0.332514
PRS_TOTAL_BD	BD	1373	2848	1.50586	1.40969	1.60859	5.1989e-34	1.17137e-17	0.419199
PRScs_BD	BD	1373	2848	1.56283	1.46258	1.66995	8.69212e-40	-2.16379e-17	0.459444
pPRS: partial polygenic score
PRS_TOTAL: Polygenic score calcualted from the SNPs with local ancestry information (PRS_TOTAL= pPRS_AFR + pPRS_EUR + pPRS_AMR)
PRScs: Polygenic score calcualted with all the intersected SNPs

## Sheet: S Table 8
Supplementary Table 8. Presence/absence of symtoms in Paisa SMI cases
Domain	Symptom		N. measures	Present	Absent
Depression	Anhedonia		7201	4989	2212
	Avolition		6816	4676	2140
	Depressed Mood		7292	4930	2362
	Fatigue		7129	5055	2074
	Hypersomnia		7132	1398	5734
	Suicidal thoughts lifetime		7243	4895	2348
	Suicide attempt		7248	2463	4785
Mania	Decreased Need Sleep		7028	3945	3083
	Flight Ideas		7022	3366	3656
	Grandiosity		7173	3070	4103
Psychosis	Any Delusion		7225	2473	4752
	Any Hallucination		7259	3116	4143
	Disorganized Speech		7260	919	6341
	Grossly Disorganized Behavior		7254	1009	6245

## Sheet:  S Table 9
Supplementary Table 9. Prediction of symptoms in Paisa using PRS estimated from GWAS summary statistics.
PRS	symptom	N_absent	N_present	OR	CI95_low	CI95_upp	pval	Mean_absent	Mean_present	Bonferronni.Sig	FDR	BH.sig	Phenotype domain
MDD	DecreasedNeedSleep	3083	3945	0.994117	0.940886	1.05036	0.833571	0.0011711	-0.00331055	FALSE	0.931884	FALSE	Mania
MDD	Hypersomnia	5734	1398	1.03091	0.969581	1.09611	0.330663	-0.00817395	0.0196067	FALSE	0.552064	FALSE	Depression
MDD	Anhedonia	2212	4989	1.06473	1.00306	1.13019	0.0393658	-0.0365437	0.0145279	FALSE	0.122161	FALSE	Depression
MDD	DepressedMood	2362	4930	1.06492	1.00469	1.12876	0.0342265	-0.034471	0.0165009	FALSE	0.112566	FALSE	Depression
MDD	Fatigue	2074	5055	1.04235	0.98422	1.10392	0.156554	-0.0278811	0.00765223	FALSE	0.343103	FALSE	Depression
MDD	FlightIdeas	3656	3366	0.995497	0.945345	1.04831	0.86412	0.00125012	-0.00313973	FALSE	0.938869	FALSE	Mania
MDD	Grandiosity	4103	3070	0.979831	0.930444	1.03184	0.440014	0.00792333	-0.0112031	FALSE	0.649867	FALSE	Mania
MDD	Suicide.attempt	4785	2463	1.08413	1.02834	1.14294	0.00272703	-0.0261555	0.0463571	FALSE	0.0180548	TRUE	Depression
MDD	Suicidal.thoughts.lifetime	2348	4895	1.10225	1.04163	1.16639	0.000742325	-0.056363	0.0258875	FALSE	0.00655429	TRUE	Depression
MDD	AnyDel	4752	2473	1.00595	0.953237	1.06157	0.829028	-0.000956005	0.00533181	FALSE	0.931884	FALSE	Psychosis
MDD	AnyHal	4143	3116	1.02823	0.97556	1.08373	0.299444	-0.0105697	0.0165119	FALSE	0.513333	FALSE	Psychosis
MDD	Disorganized.Speech	6341	919	0.967558	0.898023	1.04248	0.386096	0.00231787	-0.0273783	FALSE	0.588337	FALSE	Psychosis
MDD	Grossly.Disorganized.Behavior	6245	1009	0.997698	0.928039	1.07259	0.950246	-0.000549672	-0.0016395	FALSE	0.965329	FALSE	Psychosis
MDD	Avolition	2140	4676	1.10796	1.04575	1.17386	0.00050604	-0.0623519	0.0247646	FALSE	0.00493713	TRUE	Depression
SCZ	DecreasedNeedSleep	3083	3945	1.0253	0.971593	1.08197	0.362746	-0.0148271	0.0151441	FALSE	0.57605	FALSE	Mania
SCZ	Hypersomnia	5734	1398	0.959875	0.903851	1.01937	0.181984	0.00742079	-0.0314022	FALSE	0.38122	FALSE	Depression
SCZ	Anhedonia	2212	4989	0.922905	0.870344	0.978639	0.0073239	0.0532589	-0.023797	FALSE	0.0385633	TRUE	Depression
SCZ	DepressedMood	2362	4930	0.896629	0.846646	0.949563	0.000192663	0.0694676	-0.0334827	TRUE	0.00290806	TRUE	Depression
SCZ	Fatigue	2074	5055	0.918475	0.868049	0.97183	0.00315866	0.058869	-0.0230326	FALSE	0.0195633	TRUE	Depression
SCZ	FlightIdeas	3656	3366	0.965198	0.917614	1.01525	0.169678	0.0171648	-0.0134672	FALSE	0.36198	FALSE	Mania
SCZ	Grandiosity	4103	3070	1.00424	0.954617	1.05645	0.869932	-0.00171743	0.00707456	FALSE	0.938869	FALSE	Mania
SCZ	Suicide.attempt	4785	2463	0.911348	0.865394	0.959743	0.000437167	0.029923	-0.0600511	FALSE	0.00466312	TRUE	Depression
SCZ	Suicidal.thoughts.lifetime	2348	4895	0.889372	0.84114	0.940369	3.76727e-05	0.0737267	-0.0369915	TRUE	0.000904146	TRUE	Depression
SCZ	AnyDel	4752	2473	1.1206	1.06271	1.18165	2.58266e-05	-0.0364971	0.0729744	TRUE	0.000708386	TRUE	Psychosis
SCZ	AnyHal	4143	3116	1.04889	0.995994	1.10459	0.070613	-0.0200954	0.0263942	FALSE	0.193681	FALSE	Psychosis
SCZ	Disorganized.Speech	6341	919	1.1017	1.02371	1.18562	0.0097183	-0.0122561	0.0787193	FALSE	0.0478439	TRUE	Psychosis
SCZ	Grossly.Disorganized.Behavior	6245	1009	1.13069	1.05274	1.21441	0.000751012	-0.0151459	0.0995049	FALSE	0.00655429	TRUE	Psychosis
SCZ	Avolition	2140	4676	0.941028	0.889442	0.995605	0.0345905	0.0447712	-0.0137151	FALSE	0.112566	FALSE	Depression
BD1	DecreasedNeedSleep	3083	3945	1.00613	0.955025	1.05997	0.81825	-0.00459876	0.00544665	FALSE	0.92961	FALSE	Mania
BD1	Hypersomnia	5734	1398	0.987432	0.931706	1.04649	0.669564	0.0028202	-0.0100945	FALSE	0.840238	FALSE	Depression
BD1	Anhedonia	2212	4989	0.97592	0.922489	1.03245	0.396169	0.0159645	-0.00523218	FALSE	0.598933	FALSE	Depression
BD1	DepressedMood	2362	4930	0.985457	0.932787	1.0411	0.601154	0.00836911	-0.00405231	FALSE	0.796011	FALSE	Depression
BD1	Fatigue	2074	5055	0.981145	0.929331	1.03585	0.491663	0.0137819	-0.00452734	FALSE	0.694112	FALSE	Depression
BD1	FlightIdeas	3656	3366	0.99642	0.948908	1.04631	0.885608	0.00158847	0.00123409	FALSE	0.938869	FALSE	Mania
BD1	Grandiosity	4103	3070	1.03241	0.983126	1.08416	0.201234	-0.0132812	0.0249024	FALSE	0.406704	FALSE	Mania
BD1	Suicide.attempt	4785	2463	0.935583	0.890049	0.983445	0.00890224	0.0237427	-0.0457464	FALSE	0.0449797	TRUE	Depression
BD1	Suicidal.thoughts.lifetime	2348	4895	0.961379	0.911441	1.01405	0.147828	0.0274957	-0.0120825	FALSE	0.333918	FALSE	Depression
BD1	AnyDel	4752	2473	1.05939	1.00693	1.11459	0.0259786	-0.0217481	0.0367818	FALSE	0.0978017	FALSE	Psychosis
BD1	AnyHal	4143	3116	1.04789	0.997058	1.10131	0.0652038	-0.0197672	0.0235351	FALSE	0.184105	FALSE	Psychosis
BD1	Disorganized.Speech	6341	919	1.00988	0.941372	1.08338	0.783798	-0.00151926	0.00642522	FALSE	0.90849	FALSE	Psychosis
BD1	Grossly.Disorganized.Behavior	6245	1009	1.05865	0.988917	1.1333	0.101124	-0.00604868	0.0485733	FALSE	0.250384	FALSE	Psychosis
BD1	Avolition	2140	4676	0.975259	0.923838	1.02954	0.364662	0.0200392	-0.00491522	FALSE	0.57605	FALSE	Depression
BD	DecreasedNeedSleep	3083	3945	1.01051	0.958625	1.06521	0.697411	-0.0072005	0.00730571	FALSE	0.858351	FALSE	Mania
BD	Hypersomnia	5734	1398	0.979969	0.924162	1.03915	0.498795	0.00355369	-0.0167201	FALSE	0.694852	FALSE	Depression
BD	Anhedonia	2212	4989	0.978684	0.924638	1.03589	0.457211	0.015502	-0.00443481	FALSE	0.660034	FALSE	Depression
BD	DepressedMood	2362	4930	0.999869	0.945891	1.05693	0.996316	7.63655e-05	-2.25266e-05	FALSE	0.996316	FALSE	Depression
BD	Fatigue	2074	5055	0.982437	0.930104	1.03771	0.525779	0.0128799	-0.00538828	FALSE	0.721068	FALSE	Depression
BD	FlightIdeas	3656	3366	0.996858	0.948806	1.04734	0.900648	0.00123237	0.0012703	FALSE	0.939807	FALSE	Mania
BD	Grandiosity	4103	3070	1.02966	0.979989	1.08184	0.246611	-0.0117767	0.0230822	FALSE	0.460531	FALSE	Mania
BD	Suicide.attempt	4785	2463	0.936627	0.89062	0.98501	0.0108423	0.0231569	-0.0437174	FALSE	0.0520431	FALSE	Depression
BD	Suicidal.thoughts.lifetime	2348	4895	0.96405	0.91351	1.01739	0.182668	0.0258559	-0.011312	FALSE	0.38122	FALSE	Depression
BD	AnyDel	4752	2473	1.05345	1.00077	1.10891	0.0466466	-0.0195	0.0331996	FALSE	0.13994	FALSE	Psychosis
BD	AnyHal	4143	3116	1.01658	0.966788	1.06893	0.521085	-0.00700341	0.00762805	FALSE	0.719772	FALSE	Psychosis
BD	Disorganized.Speech	6341	919	1.00991	0.94068	1.08424	0.785466	-0.00114695	0.00749633	FALSE	0.90849	FALSE	Psychosis
BD	Grossly.Disorganized.Behavior	6245	1009	1.03909	0.969941	1.11316	0.275129	-0.00405874	0.0320905	FALSE	0.498346	FALSE	Psychosis
BD	Avolition	2140	4676	0.991102	0.938254	1.04693	0.749203	0.0111153	0.000697536	FALSE	0.888313	FALSE	Depression
Height	DecreasedNeedSleep	3083	3945	0.984346	0.936887	1.03421	0.53144	0.0138438	-0.0100046	FALSE	0.723663	FALSE	Mania
Height	Hypersomnia	5734	1398	1.04869	0.992365	1.10821	0.0914334	-0.00857842	0.0451903	FALSE	0.240482	FALSE	Depression
Height	Anhedonia	2212	4989	1.00029	0.948038	1.05542	0.991574	-0.00356439	0.00341536	FALSE	0.996316	FALSE	Depression
Height	DepressedMood	2362	4930	0.973472	0.923818	1.02579	0.314139	0.0140902	-0.00694023	FALSE	0.529076	FALSE	Depression
Height	Fatigue	2074	5055	0.973608	0.924661	1.02515	0.309474	0.0221396	-0.00566214	FALSE	0.525832	FALSE	Depression
Height	FlightIdeas	3656	3366	0.971656	0.927636	1.01776	0.224145	0.0159054	-0.0179472	FALSE	0.439141	FALSE	Mania
Height	Grandiosity	4103	3070	1.00841	0.96262	1.05637	0.724005	-0.0018169	0.00589807	FALSE	0.87427	FALSE	Mania
Height	Suicide.attempt	4785	2463	1.02842	0.980704	1.07846	0.247623	-0.0111736	0.0239212	FALSE	0.460531	FALSE	Depression
Height	Suicidal.thoughts.lifetime	2348	4895	1.0039	0.954171	1.05622	0.880626	-0.00679986	0.0031873	FALSE	0.938869	FALSE	Depression
Height	AnyDel	4752	2473	1.015	0.96706	1.06533	0.546343	-0.00501218	0.00751676	FALSE	0.731515	FALSE	Psychosis
Height	AnyHal	4143	3116	0.994294	0.948324	1.04249	0.812714	0.00487443	-0.00704697	FALSE	0.928816	FALSE	Psychosis
Height	Disorganized.Speech	6341	919	1.01397	0.948466	1.084	0.683887	-0.000251284	0.0128041	FALSE	0.852639	FALSE	Psychosis
Height	Grossly.Disorganized.Behavior	6245	1009	0.995271	0.932821	1.0619	0.885983	0.00110617	-0.00646297	FALSE	0.938869	FALSE	Psychosis
Height	Avolition	2140	4676	0.9812	0.931952	1.03305	0.470067	0.0125427	-0.0030078	FALSE	0.668539	FALSE	Depression
RCT	DecreasedNeedSleep	3083	3945	1.04312	0.991692	1.09722	0.101718	-0.0293527	0.0181479	FALSE	0.250384	FALSE	Mania
RCT	Hypersomnia	5734	1398	0.986151	0.931781	1.04369	0.629835	0.00443502	-0.0104949	FALSE	0.822642	FALSE	Depression
RCT	Anhedonia	2212	4989	0.969387	0.9175	1.02421	0.267981	0.0226834	-0.00977481	FALSE	0.490023	FALSE	Depression
RCT	DepressedMood	2362	4930	0.946171	0.896725	0.998343	0.0433261	0.0383418	-0.0180265	FALSE	0.132041	FALSE	Depression
RCT	Fatigue	2074	5055	0.966554	0.916616	1.01921	0.208805	0.0244625	-0.00846755	FALSE	0.415102	FALSE	Depression
RCT	FlightIdeas	3656	3366	1.02219	0.974685	1.07201	0.366032	-0.0143986	0.0107076	FALSE	0.57605	FALSE	Mania
RCT	Grandiosity	4103	3070	1.01658	0.969199	1.06629	0.499425	-0.010336	0.0100152	FALSE	0.694852	FALSE	Mania
RCT	Suicide.attempt	4785	2463	0.944414	0.899567	0.991496	0.0212177	0.0210767	-0.0408772	FALSE	0.0866766	FALSE	Depression
RCT	Suicidal.thoughts.lifetime	2348	4895	0.930689	0.883346	0.980569	0.00700407	0.050379	-0.0242567	FALSE	0.0384223	TRUE	Depression
RCT	AnyDel	4752	2473	1.00605	0.957334	1.05724	0.811808	-0.00247223	0.00418621	FALSE	0.928816	FALSE	Psychosis
RCT	AnyHal	4143	3116	1.023	0.97455	1.07386	0.358296	-0.0107871	0.0132527	FALSE	0.57605	FALSE	Psychosis
RCT	Disorganized.Speech	6341	919	1.05097	0.981003	1.12593	0.157256	-0.00630352	0.0461658	FALSE	0.343103	FALSE	Psychosis
RCT	Grossly.Disorganized.Behavior	6245	1009	1.04829	0.980412	1.12087	0.167333	-0.00639928	0.0415676	FALSE	0.360989	FALSE	Psychosis
RCT	Avolition	2140	4676	0.941513	0.892901	0.992772	0.0258659	0.043708	-0.0204621	FALSE	0.0978017	FALSE	Depression
N_control is the number of cases without the symptom.
N_case is the number of cases with the symptom.
Mean_absent is the mean of the PRS in cases without the symptom.
Mean_present is the mean of the PRS in cases with the symptom.
Bonferronni.Sig: Significance for the multiple test correction p< (0.05/(31*5))
BH.sig: Significance at FDR<0.05

## Sheet: S Table 10
Supplementary Table 10. Prediction of cognitive traits in Paisa using PRS estimated from GWAS summary statistics.
PRS	Phenotype	N	beta	se	pval	95%CI_upp	95%CI_low	FDR	BH.sig	Bonf.sig	Phenotype domain
MDD	DigitRecall.Accuracy	4976	0.0069715	0.0146588	0.63437	0.0357027	-0.0217597	0.822966	FALSE	FALSE	Episodic_memory		Bonferronni.Sig: Significance for the multiple test correction p< (0.05/(31*5))
MDD	DigitRecall.Speed	4976	-0.00139077	0.014687	0.924558	0.0273958	-0.0301773	0.949279	FALSE	FALSE	Episodic_memory		BH.sig: Significance at FDR<0.05
MDD	ContPerform.Accuracy	4950	0.0158266	0.0148283	0.285823	0.0448901	-0.0132368	0.50152	FALSE	FALSE	Executive_function
MDD	ContPerform.Speed	4948	-0.00233968	0.0148882	0.875126	0.0268412	-0.0315205	0.938869	FALSE	FALSE	Executive_function
MDD	EmoDiff.Accuracy	5591	0.0342749	0.0138854	0.0135712	0.0614902	0.00705956	0.0592198	FALSE	FALSE	Social_cognition
MDD	EmoDiff.Speed	5591	0.0149799	0.0139491	0.282867	0.0423201	-0.0123602	0.50152	FALSE	FALSE	Social_cognition
MDD	EmoID.Accuracy	5403	0.0503294	0.0141875	0.000388987	0.0781369	0.0225219	0.00439326	TRUE	FALSE	Social_cognition
MDD	EmoID.Speed	5403	0.0354206	0.0142705	0.0130616	0.0633907	0.00745041	0.0583215	FALSE	FALSE	Social_cognition
MDD	FaceMem.Accuracy	5464	0.0357809	0.0140943	0.0111271	0.0634057	0.00815611	0.0521073	FALSE	FALSE	Episodic_memory
MDD	FaceMem.Speed	5464	0.0266742	0.0140573	0.0577581	0.0542266	-0.000878172	0.168024	FALSE	FALSE	Episodic_memory
MDD	MatxAnalysis.Accuracy	4912	-0.0134075	0.0148115	0.365355	0.015623	-0.0424379	0.57605	FALSE	FALSE	Complex_cognition
MDD	MatxAnalysis.Speed	4837	0.025025	0.0149094	0.0932553	0.0542475	-0.00419744	0.24196	FALSE	FALSE	Complex_cognition
MDD	DigitSub.Accuracy	4976	0.0238955	0.014802	0.106452	0.0529074	-0.00511635	0.258719	FALSE	FALSE	Executive_function
MDD	DigitSub.Speed	4976	0.0314143	0.0147635	0.0333512	0.0603508	0.00247776	0.112341	FALSE	FALSE	Executive_function
MDD	MotorPx.Speed	5593	0.0160764	0.0139592	0.249454	0.0434364	-0.0112835	0.460531	FALSE	FALSE	Motor_praxis
MDD	LetterNB.Accuracy	4919	0.0107276	0.0147958	0.468425	0.0397275	-0.0182722	0.668539	FALSE	FALSE	Executive_function
MDD	LetterNB.Speed	4917	0.027055	0.014811	0.0677474	0.0560846	-0.00197456	0.188515	FALSE	FALSE	Executive_function
MDD	Adjweight	8508	0.0123442	0.0116019	0.28734	0.035084	-0.0103956	0.50152	FALSE	FALSE	Anthropometric
SCZ	DigitRecall.Accuracy	4976	-0.0694652	0.0144838	1.61818e-06	-0.0410769	-0.0978534	7.76724e-05	TRUE	TRUE	Episodic_memory
SCZ	DigitRecall.Speed	4976	-0.000223876	0.0145571	0.98773	0.0283079	-0.0287557	0.996316	FALSE	FALSE	Episodic_memory
SCZ	ContPerform.Accuracy	4950	-0.0191082	0.0146618	0.192483	0.00962885	-0.0478452	0.393158	FALSE	FALSE	Executive_function
SCZ	ContPerform.Speed	4948	-0.037234	0.0147239	0.0114447	-0.00837521	-0.0660928	0.0523188	FALSE	FALSE	Executive_function
SCZ	EmoDiff.Accuracy	5591	-0.0241005	0.0136561	0.0775941	0.0026654	-0.0508665	0.209832	FALSE	FALSE	Social_cognition
SCZ	EmoDiff.Speed	5591	-0.0547156	0.0137079	6.56462e-05	-0.0278481	-0.0815831	0.00126041	TRUE	TRUE	Social_cognition
SCZ	EmoID.Accuracy	5403	-0.0185486	0.0139959	0.185074	0.00888328	-0.0459805	0.382088	FALSE	FALSE	Social_cognition
SCZ	EmoID.Speed	5403	-0.0654946	0.01406	3.18968e-06	-0.0379369	-0.0930522	0.000122484	TRUE	TRUE	Social_cognition
SCZ	FaceMem.Accuracy	5464	-0.0148569	0.0138745	0.284256	0.0123371	-0.0420508	0.50152	FALSE	FALSE	Episodic_memory
SCZ	FaceMem.Speed	5464	-0.0331819	0.0138266	0.016401	-0.00608186	-0.060282	0.0684564	FALSE	FALSE	Episodic_memory
SCZ	MatxAnalysis.Accuracy	4912	-0.00438998	0.0146611	0.764611	0.0243457	-0.0331257	0.895154	FALSE	FALSE	Complex_cognition
SCZ	MatxAnalysis.Speed	4837	-0.0593991	0.0147164	5.43118e-05	-0.030555	-0.0882433	0.00115865	TRUE	TRUE	Complex_cognition
SCZ	DigitSub.Accuracy	4976	-0.0737497	0.0146428	4.7389e-07	-0.0450499	-0.10245	3.0329e-05	TRUE	TRUE	Executive_function
SCZ	DigitSub.Speed	4976	-0.0648889	0.0146146	8.99551e-06	-0.0362443	-0.0935335	0.000287856	TRUE	TRUE	Executive_function
SCZ	MotorPx.Speed	5593	-0.030385	0.0137432	0.0270425	-0.00344824	-0.0573218	0.0998491	FALSE	FALSE	Motor_praxis
SCZ	LetterNB.Accuracy	4919	-0.0440555	0.0145989	0.00254673	-0.0154417	-0.0726694	0.0174633	TRUE	FALSE	Executive_function
SCZ	LetterNB.Speed	4917	-0.00630685	0.0146339	0.666486	0.0223755	-0.0349892	0.840238	FALSE	FALSE	Executive_function
SCZ	Adjweight	8508	-0.0109943	0.0114565	0.337229	0.0114605	-0.033449	0.558172	FALSE	FALSE	Anthropometric
BD1	DigitRecall.Accuracy	4976	-0.027409	0.0141121	0.0521097	0.00025082	-0.0550687	0.153924	FALSE	FALSE	Episodic_memory
BD1	DigitRecall.Speed	4976	-0.0129218	0.01415	0.361136	0.0148122	-0.0406557	0.57605	FALSE	FALSE	Episodic_memory
BD1	ContPerform.Accuracy	4950	0.0123926	0.0142929	0.38592	0.0404067	-0.0156216	0.588337	FALSE	FALSE	Executive_function
BD1	ContPerform.Speed	4948	-0.0236547	0.0143489	0.0992441	0.00446927	-0.0517786	0.250384	FALSE	FALSE	Executive_function
BD1	EmoDiff.Accuracy	5591	-0.0288354	0.0133514	0.0307941	-0.00266659	-0.0550042	0.107499	FALSE	FALSE	Social_cognition
BD1	EmoDiff.Speed	5591	-0.0157809	0.0134289	0.239937	0.0105397	-0.0421015	0.456117	FALSE	FALSE	Social_cognition
BD1	EmoID.Accuracy	5403	-0.0218095	0.013644	0.109939	0.00493274	-0.0485518	0.263853	FALSE	FALSE	Social_cognition
BD1	EmoID.Speed	5403	-0.0505649	0.0137155	0.000227192	-0.0236824	-0.0774473	0.00290806	TRUE	TRUE	Social_cognition
BD1	FaceMem.Accuracy	5464	-0.0205468	0.0135624	0.129777	0.00603552	-0.0471292	0.300207	FALSE	FALSE	Episodic_memory
BD1	FaceMem.Speed	5464	-0.0109836	0.0135244	0.416717	0.0155243	-0.0374915	0.625075	FALSE	FALSE	Episodic_memory
BD1	MatxAnalysis.Accuracy	4912	0.00431167	0.0142794	0.762689	0.0322992	-0.0236759	0.895154	FALSE	FALSE	Complex_cognition
BD1	MatxAnalysis.Speed	4837	-0.0313532	0.0143559	0.0289626	-0.00321566	-0.0594908	0.104921	FALSE	FALSE	Complex_cognition
BD1	DigitSub.Accuracy	4976	-0.0474715	0.0142605	0.000871985	-0.0195209	-0.0754222	0.00727918	TRUE	FALSE	Executive_function
BD1	DigitSub.Speed	4976	-0.0450219	0.014224	0.00154972	-0.0171429	-0.072901	0.0114441	TRUE	FALSE	Executive_function
BD1	MotorPx.Speed	5593	-0.0377016	0.0134544	0.00507583	-0.011331	-0.0640722	0.0286635	TRUE	FALSE	Motor_praxis
BD1	LetterNB.Accuracy	4919	-0.024842	0.0142272	0.0807946	0.00304328	-0.0527273	0.215452	FALSE	FALSE	Executive_function
BD1	LetterNB.Speed	4917	0.00521414	0.0142517	0.714469	0.0331475	-0.0227192	0.868216	FALSE	FALSE	Executive_function
BD1	Adjweight	8508	0.0205652	0.0110855	0.0635767	0.0422929	-0.00116247	0.18219	FALSE	FALSE	Anthropometric
BD	DigitRecall.Accuracy	4976	-0.0294354	0.0142926	0.0394479	-0.00142189	-0.0574489	0.122161	FALSE	FALSE	Episodic_memory
BD	DigitRecall.Speed	4976	-0.0236296	0.0143308	0.0991748	0.00445879	-0.0517181	0.250384	FALSE	FALSE	Episodic_memory
BD	ContPerform.Accuracy	4950	0.00868648	0.0144822	0.548636	0.0370715	-0.0196986	0.731515	FALSE	FALSE	Executive_function
BD	ContPerform.Speed	4948	-0.0172065	0.0145485	0.236928	0.0113085	-0.0457215	0.454901	FALSE	FALSE	Executive_function
BD	EmoDiff.Accuracy	5591	-0.0303976	0.0135288	0.0246479	-0.00388111	-0.0569141	0.0965795	FALSE	FALSE	Social_cognition
BD	EmoDiff.Speed	5591	-0.0161498	0.0136134	0.2355	0.0105326	-0.0428321	0.454901	FALSE	FALSE	Social_cognition
BD	EmoID.Accuracy	5403	-0.0110182	0.0138256	0.425482	0.0160799	-0.0381164	0.633276	FALSE	FALSE	Social_cognition
BD	EmoID.Speed	5403	-0.048305	0.0139079	0.000514284	-0.0210455	-0.0755645	0.00493713	TRUE	FALSE	Social_cognition
BD	FaceMem.Accuracy	5464	-0.0298738	0.0137464	0.0297653	-0.00293074	-0.0568168	0.105832	FALSE	FALSE	Episodic_memory
BD	FaceMem.Speed	5464	-0.0171903	0.0137045	0.209713	0.00967052	-0.0440511	0.415102	FALSE	FALSE	Episodic_memory
BD	MatxAnalysis.Accuracy	4912	-0.00158953	0.0144602	0.912469	0.0267525	-0.0299316	0.941904	FALSE	FALSE	Complex_cognition
BD	MatxAnalysis.Speed	4837	-0.0299542	0.0145208	0.0391265	-0.00149351	-0.058415	0.122161	FALSE	FALSE	Complex_cognition
BD	DigitSub.Accuracy	4976	-0.0442132	0.0144688	0.00224499	-0.0158542	-0.0725721	0.0159644	TRUE	FALSE	Executive_function
BD	DigitSub.Speed	4976	-0.0477017	0.0144183	0.000938249	-0.0194419	-0.0759615	0.00750599	TRUE	FALSE	Executive_function
BD	MotorPx.Speed	5593	-0.0443699	0.0136267	0.00112954	-0.0176616	-0.0710783	0.00867487	TRUE	FALSE	Motor_praxis
BD	LetterNB.Accuracy	4919	-0.0310208	0.0144237	0.031501	-0.00275039	-0.0592911	0.108003	FALSE	FALSE	Executive_function
BD	LetterNB.Speed	4917	0.0128871	0.0144526	0.372565	0.0412141	-0.01544	0.579921	FALSE	FALSE	Executive_function
BD	Adjweight	8508	0.0158702	0.0111984	0.156429	0.0378191	-0.00607868	0.343103	FALSE	FALSE	Anthropometric
Height	DigitRecall.Accuracy	4976	0.00823537	0.013507	0.542055	0.0347092	-0.0182385	0.731515	FALSE	FALSE	Episodic_memory
Height	DigitRecall.Speed	4976	-0.0010786	0.0135358	0.936488	0.0254517	-0.0276088	0.956413	FALSE	FALSE	Episodic_memory
Height	ContPerform.Accuracy	4950	-0.00514505	0.013636	0.70594	0.0215815	-0.0318716	0.863315	FALSE	FALSE	Executive_function
Height	ContPerform.Speed	4948	-0.00540099	0.013695	0.693304	0.0214413	-0.0322433	0.858351	FALSE	FALSE	Executive_function
Height	EmoDiff.Accuracy	5591	0.0112566	0.0126761	0.374532	0.0361019	-0.0135886	0.579921	FALSE	FALSE	Social_cognition
Height	EmoDiff.Speed	5591	-0.00200437	0.0127453	0.875037	0.0229765	-0.0269852	0.938869	FALSE	FALSE	Social_cognition
Height	EmoID.Accuracy	5403	0.0020095	0.0129895	0.877056	0.0274688	-0.0234498	0.938869	FALSE	FALSE	Social_cognition
Height	EmoID.Speed	5403	-0.00567146	0.0130794	0.664566	0.0199642	-0.0313071	0.840238	FALSE	FALSE	Social_cognition
Height	FaceMem.Accuracy	5464	0.00625549	0.012895	0.627599	0.0315297	-0.0190187	0.822642	FALSE	FALSE	Episodic_memory
Height	FaceMem.Speed	5464	-0.00423141	0.0128554	0.74204	0.0209652	-0.0294281	0.888313	FALSE	FALSE	Episodic_memory
Height	MatxAnalysis.Accuracy	4912	0.0104241	0.0136398	0.444722	0.0371581	-0.0163099	0.649984	FALSE	FALSE	Complex_cognition
Height	MatxAnalysis.Speed	4837	-0.00621987	0.0137121	0.650114	0.0206559	-0.0330956	0.83773	FALSE	FALSE	Complex_cognition
Height	DigitSub.Accuracy	4976	0.00284795	0.013657	0.834812	0.0296157	-0.0239198	0.931884	FALSE	FALSE	Executive_function
Height	DigitSub.Speed	4976	0.00154621	0.0136215	0.909624	0.0282444	-0.025152	0.941904	FALSE	FALSE	Executive_function
Height	MotorPx.Speed	5593	0.0022312	0.0127648	0.861242	0.0272502	-0.0227878	0.938869	FALSE	FALSE	Motor_praxis
Height	LetterNB.Accuracy	4919	-0.00180128	0.0136298	0.894859	0.024913	-0.0285156	0.938869	FALSE	FALSE	Executive_function
Height	LetterNB.Speed	4917	-0.00600602	0.0136445	0.659807	0.0207372	-0.0327492	0.840238	FALSE	FALSE	Executive_function
Height	Adjweight	8508	0.146481	0.0105139	4.04301e-44	0.167089	0.125874	7.76259e-42	TRUE	TRUE	Anthropometric
RCT	DigitRecall.Accuracy	4976	-0.0370844	0.0138537	0.00743147	-0.00993121	-0.0642376	0.0385633	TRUE	FALSE	Episodic_memory
RCT	DigitRecall.Speed	4976	0.0146923	0.0138836	0.289941	0.0419042	-0.0125195	0.50152	FALSE	FALSE	Episodic_memory
RCT	ContPerform.Accuracy	4950	-0.0220493	0.0140119	0.115578	0.0054141	-0.0495126	0.273963	FALSE	FALSE	Executive_function
RCT	ContPerform.Speed	4948	-0.0755971	0.014015	6.89039e-08	-0.0481276	-0.103066	6.61478e-06	TRUE	TRUE	Executive_function
RCT	EmoDiff.Accuracy	5591	-0.00180049	0.0130894	0.890593	0.0238547	-0.0274557	0.938869	FALSE	FALSE	Social_cognition
RCT	EmoDiff.Speed	5591	-0.0391136	0.0131222	0.00287564	-0.0133942	-0.0648331	0.0184041	TRUE	FALSE	Social_cognition
RCT	EmoID.Accuracy	5403	-0.0307321	0.0133891	0.0217156	-0.00448946	-0.0569748	0.0868622	FALSE	FALSE	Social_cognition
RCT	EmoID.Speed	5403	-0.0384682	0.0134425	0.00421408	-0.0121208	-0.0648156	0.0252845	TRUE	FALSE	Social_cognition
RCT	FaceMem.Accuracy	5464	-0.0376725	0.0132837	0.00456837	-0.0116364	-0.0637085	0.0265796	TRUE	FALSE	Episodic_memory
RCT	FaceMem.Speed	5464	-0.0475806	0.0132542	0.000330865	-0.0216024	-0.0735588	0.00397038	TRUE	FALSE	Episodic_memory
RCT	MatxAnalysis.Accuracy	4912	-0.0106281	0.0139723	0.446864	0.0167576	-0.0380137	0.649984	FALSE	FALSE	Complex_cognition
RCT	MatxAnalysis.Speed	4837	-0.0215664	0.014095	0.125999	0.00605982	-0.0491926	0.295021	FALSE	FALSE	Complex_cognition
RCT	DigitSub.Accuracy	4976	-0.0527436	0.0139365	0.000153985	-0.0254279	-0.0800592	0.00268774	TRUE	TRUE	Executive_function
RCT	DigitSub.Speed	4976	-0.0513576	0.0139258	0.000226067	-0.0240631	-0.0786522	0.00290806	TRUE	TRUE	Executive_function
RCT	MotorPx.Speed	5593	-0.031955	0.013167	0.0152286	-0.00614764	-0.0577623	0.0649752	FALSE	FALSE	Motor_praxis
RCT	LetterNB.Accuracy	4919	-0.00447888	0.0140281	0.749514	0.0230161	-0.0319739	0.888313	FALSE	FALSE	Executive_function
RCT	LetterNB.Speed	4917	-0.051852	0.0140172	0.000216308	-0.0243783	-0.0793258	0.00290806	TRUE	TRUE	Executive_function
RCT	Adjweight	8508	0.0158187	0.010802	0.14308	0.0369907	-0.00535331	0.32704	FALSE	FALSE	Anthropometric

[truncated: 4 more sheets: S Table 11, S Table 12, S Table 13, S Table 14]
